# Supplementary material for: Resistin enhances angiogenesis in osteosarcoma via the MAPK signaling pathway
Source: publisher site journal article supplement (doi:10.18632/aging.102423), 2019-11-13
Supplement: Supplementary file [file aging-v11i21-102423-supplementary-material-SD1.pdf]

## SUPPLEMENTARY FIGURE

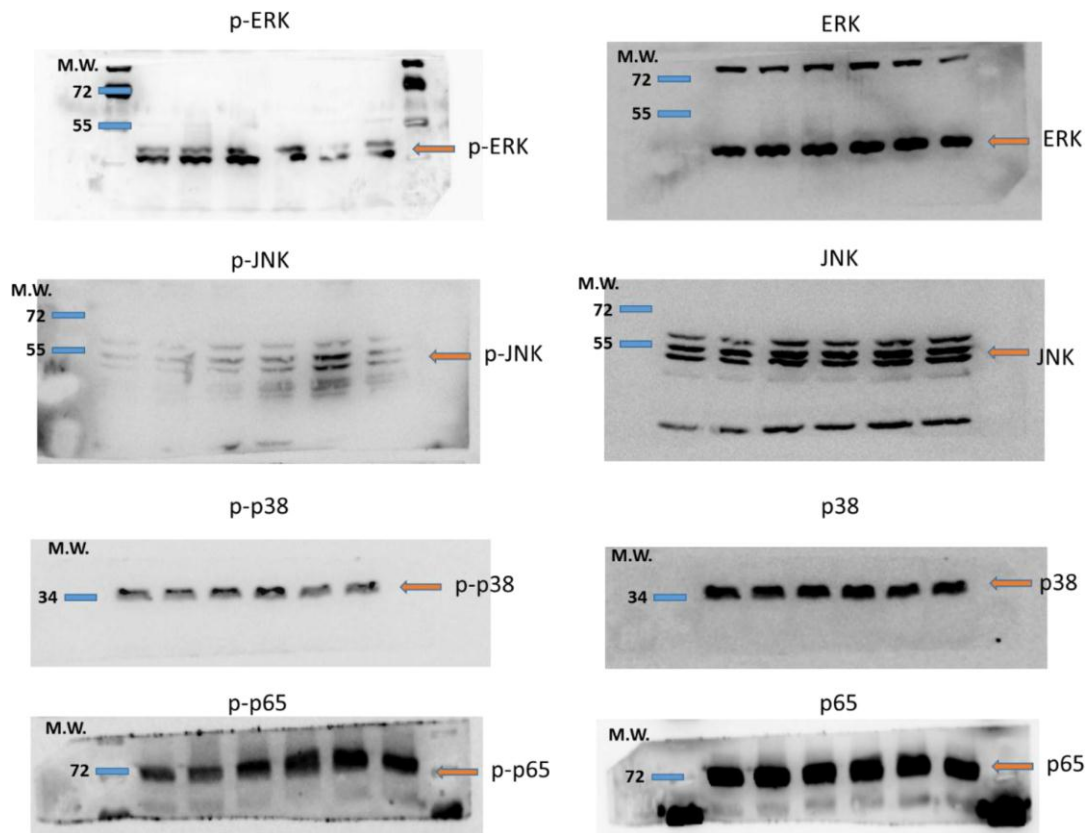

Supplementary Figure 1. The full length of the original immunoblotting results in this study.
